# Supplementary material for: On the effect of the nature of counterions on the self-assembly of polyoxyethylene alkyl ether carboxylic acids
Source: Royal Society of Chemistry journal article supplement (doi:10.1039/d0sm00986e), 2020-01-01
Supplement: d0sm00986e1.pdf [file d0sm00986e1.pdf]

**Supporting Information:**

**On the effect of the nature of counterions on the  
self-assembly of polyoxyethylene alkylether  
carboxylic acids.**

Chiara Crivello,<sup>†,‡,¶</sup> Giuseppe Lazzara,<sup>‡</sup> and Leonardo Chiappisi<sup>\*,†</sup>

<sup>†</sup>*Institut Max von Laue - Paul Langevin, 71 avenue des Martyrs, 38042 Grenoble, France.*

<sup>‡</sup>*Dipartimento di Fisica e Chimica, Università degli Studi di Palermo, Viale delle Scienze  
pad 17, 90128 Palermo, Italy.*

<sup>¶</sup>*Present address: Laboratoire des Matériaux et du Génie Physique - Grenoble  
INP-Minatec, 3 parvis Louis Néel, 38016 Grenoble, France.*

E-mail: [chiappisi@ill.eu](mailto:chiappisi@ill.eu)

Phone: +123 (0)123 4445556

Table S1: Parameters for the ionization process of Arginine, Choline hydroxide, and Sodium hydroxide obtained from the fitting of the apparent partial molar volume and compressibility data. Uncertainties from the fit are reported in parentheses.

|                                                            | $V_0$<br>( $\text{cm}^3 \text{ mol}^{-1}$ ) | $V_i$<br>( $\text{cm}^3 \text{ mol}^{-1}$ ) | $K_0$<br>( $\text{cm}^3 \text{ mol}^{-1} \text{ GPa}^{-1}$ ) | $K_i$<br>( $\text{cm}^3 \text{ mol}^{-1} \text{ GPa}^{-1}$ ) | $\Delta V_t$<br>( $\text{cm}^3 \text{ mol}^{-1}$ ) | $\Delta K_t$<br>( $\text{cm}^3 \text{ mol}^{-1} \text{ GPa}^{-1}$ ) |
|------------------------------------------------------------|---------------------------------------------|---------------------------------------------|--------------------------------------------------------------|--------------------------------------------------------------|----------------------------------------------------|---------------------------------------------------------------------|
| $\text{C}_{18:1}\text{E}_9\text{CH}_2\text{COOH}$ Arginine | 125.9(4)                                    | 106.7(4)                                    | 3900(200)                                                    | 9100(200)                                                    | -19.2(8)                                           | 5200(400)                                                           |
| $\text{C}_{18:1}\text{E}_9\text{CH}_2\text{COOH}$ Choline  | 108.5(7)                                    | 115.4(7)                                    | 1800(400)                                                    | 3000(400)                                                    | 7(1)                                               | 1200(800)                                                           |
| $\text{C}_{18:1}\text{E}_9\text{CH}_2\text{COOH}$ NaOH     | 1.6(7)                                      | 13.2(8)                                     | 100(50)                                                      | 750(50)                                                      | 12(2)                                              | 650(100)                                                            |
| $\text{C}_{18:1}\text{E}_5\text{CH}_2\text{COOH}$ Arginine | 124.5(6)                                    | 108.3(5)                                    | 4200(300)                                                    | 8500(300)                                                    | -16(1)                                             | 4300(600)                                                           |
| $\text{C}_{18:1}\text{E}_5\text{CH}_2\text{COOH}$ Choline  | 103.0(2)                                    | 105.9(2)                                    | 3800(100)                                                    | 5000(100)                                                    | 2.9(4)                                             | 1200(200)                                                           |
| $\text{C}_{18:1}\text{E}_5\text{CH}_2\text{COOH}$ NaOH     | -2.9(2)                                     | 3(2)                                        | -220(20)                                                     | 230(20)                                                      | 5.9(4)                                             | 450(40)                                                             |

Table S2: Fit parameters obtained from the analysis of the small-angle neutron scattering patterns from 1vol% solutions of  $C_{18:1}E_9CH_2COOH$  partially neutralized with different counterions. A model of core-shell prolate ellipsoids, with rotational axis  $A$  and equatorial axes  $B$ , and shell thickness  $T$  was used. The value of  $B$  was kept constant at 2 nm. A charged hard-sphere structure feature, characterized by a charge of  $Z$  electron charges per sphere and radius  $R_{HS}$  was used to describe the interaction between the ellipsoids.  $N_{agg}$  is the number of surfactant molecules per micelle.  $\phi_w$  is the volume fraction of water in the shell. Uncertainties from the fit are reported in parentheses.

| CI       | R   | A<br>(nm) | B<br>(nm) | T<br>(nm) | $R_{HS}$<br>(nm) | Z     | $N_{agg}$ | $Z/N_{agg}$ | $\phi_w$ |
|----------|-----|-----------|-----------|-----------|------------------|-------|-----------|-------------|----------|
| T = 25 ° |     |           |           |           |                  |       |           |             |          |
| —        | 0   | 17.7(1)   | 2*        | 1.5(1)    | —                | —     | 640(10)   | —           | 0.59(1)  |
| NaOH     | 0.2 | 8.1(2)    | 2*        | 1.4(1)    | 8.6(8)           | 32(2) | 292(9)    | 0.11(1)     | 0.50(1)  |
| NaOH     | 0.5 | 4.7(1)    | 2*        | 1.3(1)    | 6.5(1)           | 32(1) | 168(5)    | 0.19(1)     | 0.61(1)  |
| Arginine | 0.2 | 4.7(1)    | 2*        | 1.5(1)    | 8.0(1)           | 29(1) | 170(5)    | 0.17(1)     | 0.68(1)  |
| Arginine | 0.5 | 3.8(1)    | 2*        | 1.8(1)    | 8.2(1)           | 33(1) | 136(5)    | 0.24(1)     | 0.74(1)  |
| Choline  | 0.2 | 4.9(1)    | 2*        | 1.6(1)    | 7.9(1)           | 30(1) | 179(5)    | 0.16(1)     | 0.68(1)  |
| Choline  | 0.5 | 3.8(1)    | 2*        | 2.0(1)    | 7.9(1)           | 33(2) | 137(5)    | 0.25(1)     | 0.77(1)  |
| T = 40 ° |     |           |           |           |                  |       |           |             |          |
| None     | —   | 46.8(5)   | 2*        | 1.2(1)    | —                | —     | 1690(20)  | —           | 0.50(2)  |
| NaOH     | 0.2 | 6.0(1)    | 2*        | 1.3(1)    | 8.6(1)           | 29(1) | 217(5)    | 0.13(1)     | 0.59(1)  |
| NaOH     | 0.5 | 4.1(1)    | 2*        | 1.5(1)    | 8.8(1)           | 31(1) | 148(5)    | 0.21(1)     | 0.68(1)  |
| Arginine | 0.2 | 5.4(1)    | 2*        | 1.5(1)    | 8.0(1)           | 29(1) | 195(4)    | 0.15(1)     | 0.66(1)  |
| Arginine | 0.5 | 3.7(1)    | 2*        | 1.7(1)    | 8.1(1)           | 32(1) | 135(5)    | 0.24(1)     | 0.73(1)  |
| Choline  | 0.2 | 6.2(1)    | 2*        | 1.6(1)    | 7.9(5)           | 31(1) | 225(5)    | 0.14(1)     | 0.68(1)  |
| Choline  | 0.5 | 3.7(1)    | 2*        | 1.9(1)    | 7.7(1)           | 33(1) | 135(5)    | 0.24(1)     | 0.77(1)  |
